# Supplementary material for: Habitat heterogeneity and connectivity shape microbial communities in South American peatlands
Source: PubMed Central journal article supplement (PMC4861955; doi:10.1038/srep25712), 2016-05-10

## Habitat heterogeneity and connectivity shape aquatic microbial communities in South American peatlands.

Felix Oloo, Angel Valverde, María Victoria Quiroga, Surendra Vikram, Don Cowan, and Gabriela Mataloni

**Supplementary Table S1.** Diversity measures and estimates.

**Supplementary Table S2.** Metadata and water chemistry of samples from pools and *S. magellanicum* interstitial waters.

**Supplementary Figure S1.** Rarefaction curves. (a) 16S rRNA genes (b) *nifH* genes.

**Supplementary Figure S2.** Diversity measures for the three habitats. The middle line in each box depicts the median of the respective data set. The box width represents 50% of the data, while both whiskers and outliers indicate the distribution of remaining data points, thus representing the overall variation. Different letters above each box denote a significant mean difference between respective habitats ( $P < 0.05$ ). CP, clear pools; VP, vegetated pools; SM, *S. magellanicum* interstitial waters.

**Supplementary Figure S3.** Taxonomic affiliation of putative nitrogen-fixing bacteria obtained by BLAST analysis. CP, clear pools; VP, vegetated pools; SM, *S. magellanicum* interstitial waters.

**Supplementary Figure S4.** Multidimensional scaling diagrams showing the degree of similarity (weighted UniFrac) between (a) total bacterial communities, (b) putative nitrogen-fixing communities.

**Supplementary Figure S5.** Differences in within-habitat dissimilarity (Bray-Curtis index) measured by permutation dispersion. Different letters above each box indicate statistically significant differences in means between (a) bacterial communities and (b) environmental data ( $P < 0.05$ ). CP, clear pools; VP, vegetated pools; SM, *S. magellanicum* interstitial waters.

**Supplementary Figure S6.** Differences in environmental conditions. Different letters above each box denote a significant mean difference between respective habitats ( $P < 0.05$ ). CP, clear pools; VP, vegetated pools; SM, *Sphagnum magellanicum* interstitial waters.

**Supplementary Figure S7.** Maps of the sampling area. AN, Andorra peat bog; RH, Rancho Hambre peat bog. CP, clear pools; VP, vegetated pools; SM, *S. magellanicum* interstitial waters. The maps were generated using Google Earth Pro v7.0 (<https://www.google.com>) and CorelDRAW vX8 (<http://www.coreldraw.com>). Map data: Google, DigitalGlobe.

## Supplementary Table S1.

### Total bacteria

| Sample | Location | Habitat | Richness | Shannon | Inverse Simpson | Pielou's | Chao1  | Good's coverage |
|--------|----------|---------|----------|---------|-----------------|----------|--------|-----------------|
| ANCP1  | AN       | CP      | 2210     | 5.6     | 62.8            | 1277.5   | 4570.3 | 98%             |
| ANCP2  | AN       | CP      | 1962     | 4.4     | 17.4            | 1321.4   | 7738.4 | 97%             |
| ANCP3  | AN       | CP      | 1327     | 4.2     | 21.9            | 930.5    | 4530.6 | 98%             |
| ANCP4  | AN       | CP      | 2432     | 4.1     | 10.0            | 1717.4   | 4642.2 | 97%             |
| ANSM1  | AN       | SM      | 3423     | 5.8     | 63.0            | 1953.3   | 6256.6 | 96%             |
| ANSM2  | AN       | SM      | 3370     | 5.7     | 69.7            | 1941.5   | 6550.6 | 95%             |
| ANSM3  | AN       | SM      | 3459     | 5.7     | 64.8            | 1987.7   | 6717.5 | 95%             |
| ANSM4  | AN       | SM      | 3182     | 5.5     | 59.3            | 1857.8   | 6534.6 | 96%             |
| ANVP1  | AN       | VP      | 2837     | 5.4     | 36.2            | 1686.8   | 5149.2 | 96%             |
| ANVP2  | AN       | VP      | 2000     | 3.5     | 8.2             | 1593.9   | 4097.5 | 97%             |
| ANVP3  | AN       | VP      | 2762     | 4.5     | 12.6            | 1824.8   | 5061.4 | 97%             |
| ANVP4  | AN       | VP      | 2980     | 5.3     | 28.9            | 1793.5   | 5494.0 | 96%             |
| RHCP1  | RH       | CP      | 1668     | 4.0     | 19.3            | 1200.6   | 3796.8 | 98%             |
| RHCP2  | RH       | CP      | 1974     | 3.9     | 19.9            | 1442.0   | 4220.4 | 97%             |
| RHCP3  | RH       | CP      | 1412     | 4.0     | 16.1            | 1019.5   | 3110.8 | 98%             |
| RHCP4  | RH       | CP      | 1179     | 4.6     | 18.9            | 777.5    | 2648.7 | 98%             |
| RHSM1  | RH       | SM      | 4010     | 5.8     | 44.2            | 2275.7   | 7242.0 | 95%             |
| RHSM2  | RH       | SM      | 1761     | 5.7     | 79.0            | 1007.8   | 3712.2 | 98%             |
| RHSM3  | RH       | SM      | 3123     | 6.1     | 82.1            | 1733.1   | 5140.5 | 97%             |
| RHSM4  | RH       | SM      | 1753     | 5.9     | 121.8           | 985.4    | 3795.3 | 98%             |
| RHVP1  | RH       | VP      | 868      | 3.1     | 13.5            | 760.1    | 4129.1 | 98%             |
| RHVP2  | RH       | VP      | 2481     | 3.6     | 7.7             | 1951.8   | 5220.6 | 96%             |
| RHVP3  | RH       | VP      | 1019     | 5.0     | 79.5            | 629.6    | 3217.8 | 98%             |
| RHVP4  | RH       | VP      | 2560     | 4.1     | 13.6            | 1814.6   | 5215.3 | 96%             |

### Nitrogen-fixing bacteria

| Sample | Location | Habitat | Richness | Shannon | Inverse Simpson | Pielou's | Chao1 | Good's coverage |
|--------|----------|---------|----------|---------|-----------------|----------|-------|-----------------|
| ANCP1  | AN       | CP      | 17       | 2.0     | 4.7             | 25.1     | 17.0  | 100%            |
| ANCP2  | AN       | CP      | 14       | 1.2     | 2.2             | 95.5     | 14.0  | 100%            |
| ANCP3  | AN       | CP      | 13       | 1.6     | 3.7             | 26.5     | 13.0  | 100%            |
| ANCP4  | AN       | CP      | 64       | 3.1     | 12.7            | 56.1     | 64.0  | 100%            |
| ANSM1  | AN       | SM      | 89       | 3.6     | 19.8            | 69.1     | 89.0  | 100%            |
| ANSM2  | AN       | SM      | 74       | 3.1     | 8.7             | 65.1     | 74.0  | 100%            |
| ANSM3  | AN       | SM      | 48       | 3.0     | 10.5            | 44.1     | 48.0  | 100%            |
| ANSM4  | AN       | SM      | 49       | 2.9     | 10.1            | 45.6     | 49.0  | 100%            |
| ANVP1  | AN       | VP      | 81       | 3.4     | 12.6            | 66.9     | 81.0  | 100%            |
| ANVP2  | AN       | VP      | 4        | 0.9     | 2.1             | 61.3     | 4.0   | 100%            |
| ANVP3  | AN       | VP      | 13       | 1.9     | 5.6             | 19.5     | 13.0  | 100%            |
| ANVP4  | AN       | VP      | 69       | 2.6     | 6.0             | 72.0     | 112.5 | 97%             |
| RHCP1  | RH       | CP      | 23       | 1.7     | 3.6             | 42.1     | 23.0  | 100%            |
| RHCP2  | RH       | CP      | 12       | 2.3     | 7.7             | 14.6     | 12.0  | 100%            |
| RHCP3  | RH       | CP      | NA       | NA      | NA              | NA       | NA    | NA              |
| RHCP4  | RH       | CP      | NA       | NA      | NA              | NA       | NA    | NA              |
| RHSM1  | RH       | SM      | 89       | 3.7     | 27.2            | 67.4     | 320.0 | 98%             |
| RHSM2  | RH       | SM      | 44       | 2.6     | 6.6             | 46.7     | 48.2  | 99%             |
| RHSM3  | RH       | SM      | 27       | 1.6     | 3.0             | 58.3     | 27.0  | 100%            |
| RHSM4  | RH       | SM      | 8        | 1.1     | 2.0             | 80.4     | 8.0   | 100%            |
| RHVP1  | RH       | VP      | NA       | NA      | NA              | NA       | NA    | NA              |
| RHVP2  | RH       | VP      | 11       | 1.9     | 4.8             | 16.5     | 11.0  | 100%            |
| RHVP3  | RH       | VP      | NA       | NA      | NA              | NA       | NA    | NA              |
| RHVP4  | RH       | VP      | 46       | 2.4     | 5.3             | 52.8     | 166.0 | 98%             |

NA: no amplification

Supplementary Table S2.

| Barcode   | Sample    | Location | Habitat | Latitude | Longitude | pH   | Conductivity | NH <sub>4</sub> | Total N | Total P | Chl a | DOC   |
|-----------|-----------|----------|---------|----------|-----------|------|--------------|-----------------|---------|---------|-------|-------|
| 16s rRNA  | nifH      |          |         |          |           |      | µS/cm        | µg/L            | µg/L    | µg/L    | µg/L  | mg/ml |
| TCCTGTAC  | AGAGCTATT | ANCP1    | CP      | 54.75611 | 68.33778  | 4.62 | 34           | 50              | 7900    | 220     | 4.0   | 15.12 |
| TCCTTCCA  | AGAGTACGT | ANCP2    | CP      | 54.75543 | 68.33779  | 4.4  | 39.7         | 30              | 10800   | 110     | 1.4   | 11.91 |
| TCCTTCTT  | AGAGTGCCT | ANCP3    | CP      | 54.75516 | 68.33839  | 3.6  | 38.9         | 10              | 4100    | 520     | 6.1   | 14.49 |
| TCGAAAGG  | AGATATACT | ANCP4    | CP      | 54.7533  | 68.33976  | 4    | 9.7          | 40              | 8500    | 200     | 5.9   | 12.23 |
| TCGACCGG  | AGCATTACT | ANSM1    | SM      | 54.75586 | 68.33755  | 3.95 | 122.1        | 150             | 100     | 1070    | 10.1  | 23.04 |
| TCGACCTA  | AGCCACGCT | ANSM2    | SM      | 54.7546  | 68.33848  | 3.86 | 144.4        | 70              | 6400    | 620     | 29.5  | 22.83 |
| TCGACGAA  | AGCCACGGT | ANSM3    | SM      | 54.75367 | 68.33915  | 3.8  | 67.6         | 10              | 2300    | 520     | 28.9  | 16.12 |
| TCGACGAC  | AGCCATCGT | ANSM4    | SM      | 54.7531  | 68.3396   | 3.3  | 140.1        | 30              | 900     | 1150    | 25.3  | 20.35 |
| TCGAACT   | AGATGATGT | ANVP1    | VP      | 54.75539 | 68.33811  | 4.28 | 46.8         | 20              | 2700    | 550     | 4.4   | 11.61 |
| TCGAAAG   | AGCACGACT | ANVP2    | VP      | 54.75511 | 68.33801  | 4.3  | 31.1         | 10              | 2900    | 410     | 3.5   | 8.421 |
| TCGAAATCC | AGCAGAACT | ANVP3    | VP      | 54.75406 | 68.33896  | 4.6  | 23.2         | 20              | 2900    | 420     | 1.3   | 6.285 |
| TCGACAAC  | AGCATGCCT | ANVP4    | VP      | 54.7533  | 68.33976  | 4.1  | 33.2         | 30              | 4900    | 260     | 7.1   | 9.363 |
| TCCGGCCG  | ACTTCACCT | RHCP1    | CP      | 54.74796 | 67.82478  | 4.26 | 21.7         | 40              | 3800    | 910     | 2.5   | 7.993 |
| TCCGGTAA  | ACTTCTATT | RHCP2    | CP      | 54.74689 | 67.82554  | 4.67 | 25.8         | 10              | 1900    | 160     | 0.3   | 6.783 |
| TCCGTCTT  | ACTTGCAGT | RHCP3    | CP      | 54.74512 | 67.82451  | 6.19 | 22           | 0               | 2500    | 210     | 8.2   | 5.077 |
| TCCGTGCG  | ACTTGGTGT | RHCP4    | CP      | 54.74432 | 67.8242   | 4.35 | 30.2         | 20              | 1900    | 270     | 10.1  | 12.85 |
| TCCTCCCT  | AGACTGCTT | RHSM1    | SM      | 54.74387 | 67.82494  | 3.57 | 74.7         | 150             | 1800    | 750     | 15.2  | 24.1  |
| TCCTCGTA  | AGACTTACT | RHSM2    | SM      | 54.74778 | 67.8249   | 4.37 | 61.6         | 80              | 6400    | 1920    | 15.5  | 19.37 |
| TCCTCGTG  | AGAGCAAGT | RHSM3    | SM      | 54.74627 | 67.82583  | 3.93 | 85.4         | 120             | 3400    | 850     | 11.9  | 28.78 |
| TCCTGGCA  | AGAGCGCGT | RHSM4    | SM      | 54.74487 | 67.82455  | 3.94 | 69.4         | 20              | 3300    | 510     | 2.6   | 24.59 |
| TCCGTGCT  | AGAACGCTT | RHVP1    | VP      | 54.74914 | 67.82542  | 4.36 | 41.4         | 0               | 2000    | 220     | 1.8   | 16.89 |
| TCCGTTC   | AGAACTATT | RHVP2    | VP      | 54.74809 | 67.82444  | 4.36 | 37.1         | 20              | 1800    | 300     | 1.6   | 15.87 |
| TCCGTTTT  | AGAAATGTT | RHVP3    | VP      | 54.74465 | 67.82464  | 3.93 | 47.9         | 10              | 1400    | 470     | 1.6   | 21.23 |
| TCCTAATA  | AGACAACCT | RHVP4    | VP      | 54.74394 | 67.82448  | 4.44 | 48.6         | 0               | 1500    | 320     | 3.8   | 18.12 |

AN, Andorra peat bog; RH, Rancho hambre peat bog, CP, clear pools; VP, vegetated pools; SM, *Sphagnum magellanicum* interstitial waters

Supplementary Figure S1.

**a**

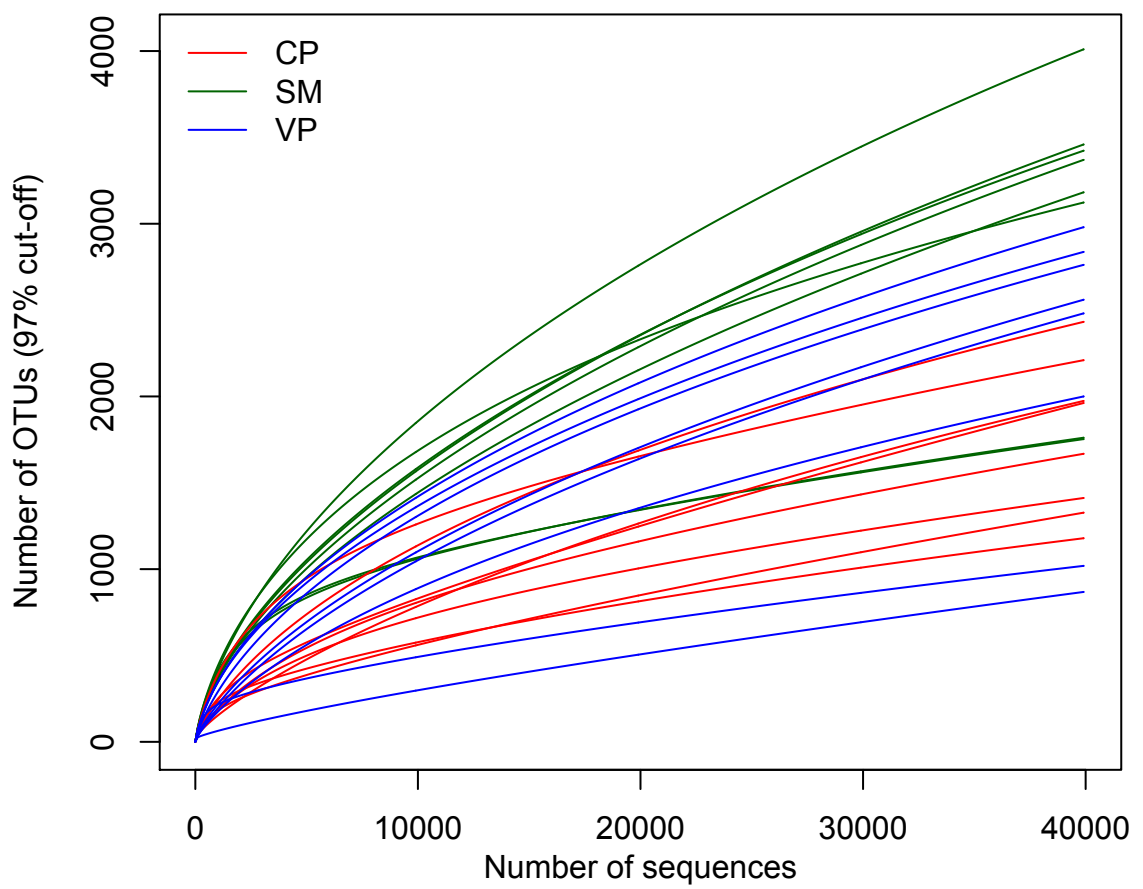

**b**

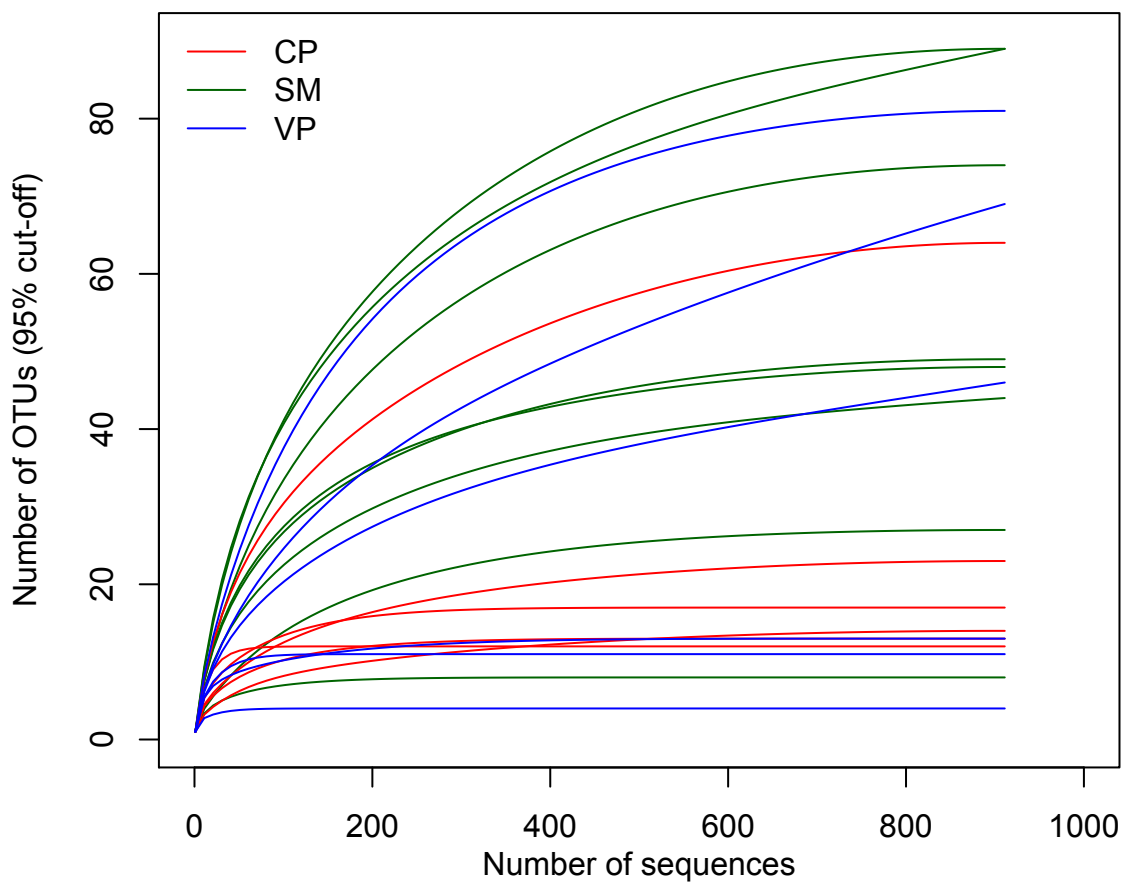

**Supplementary Figure S2.**

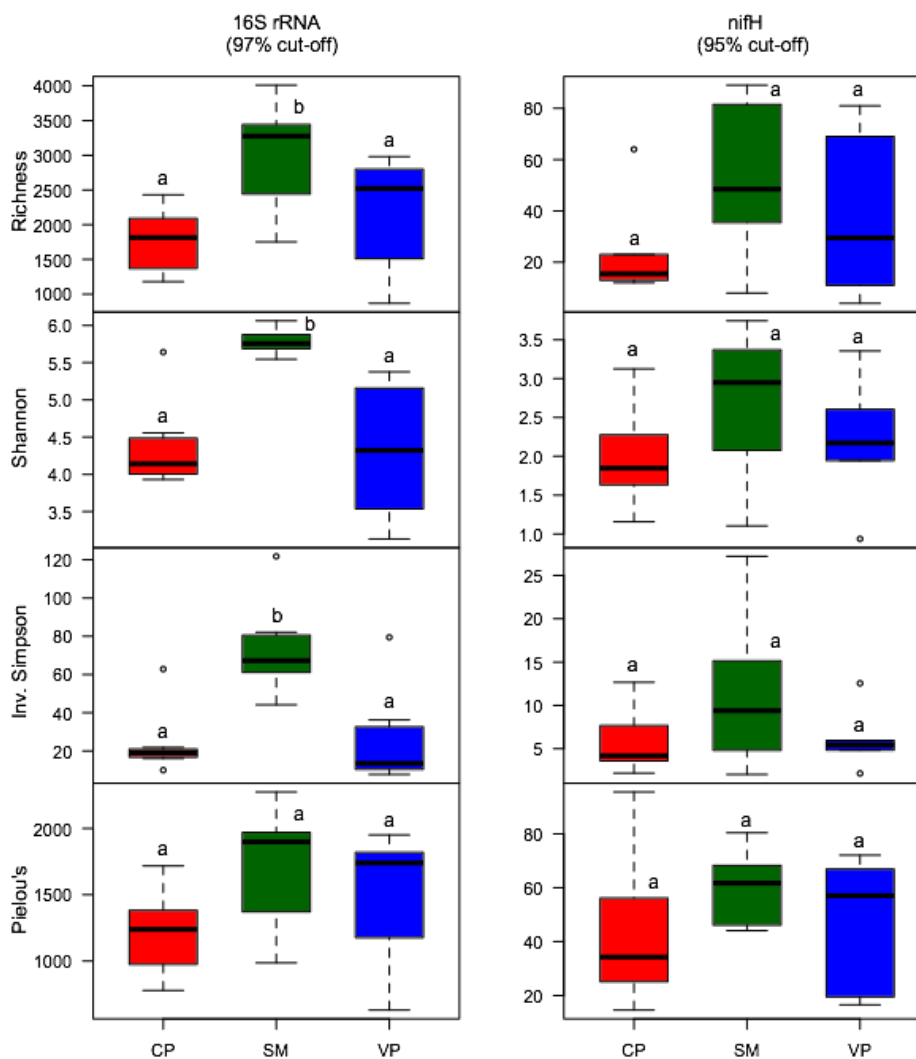

**Supplementary Figure S3.**

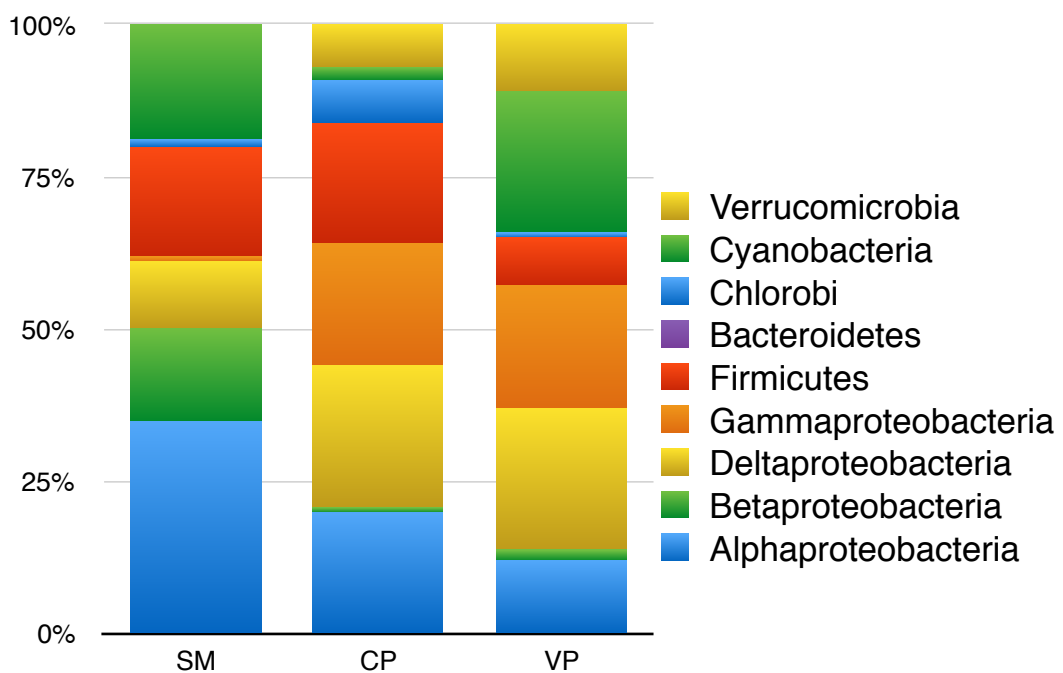

Supplementary Figure S4.

**a**

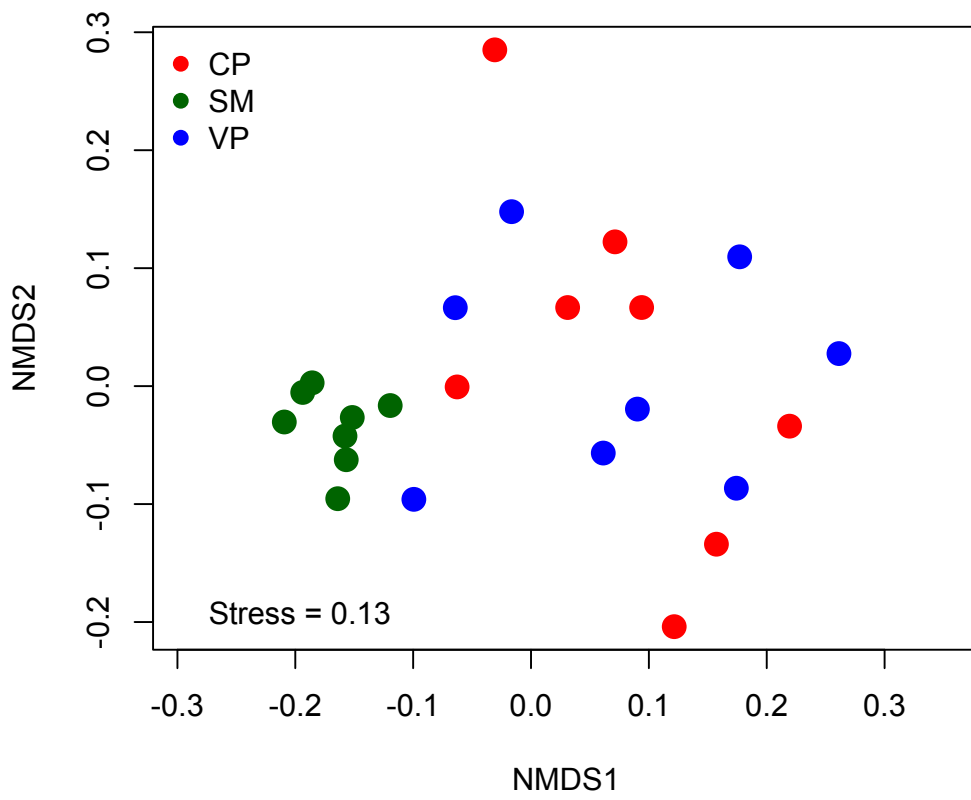

**b**

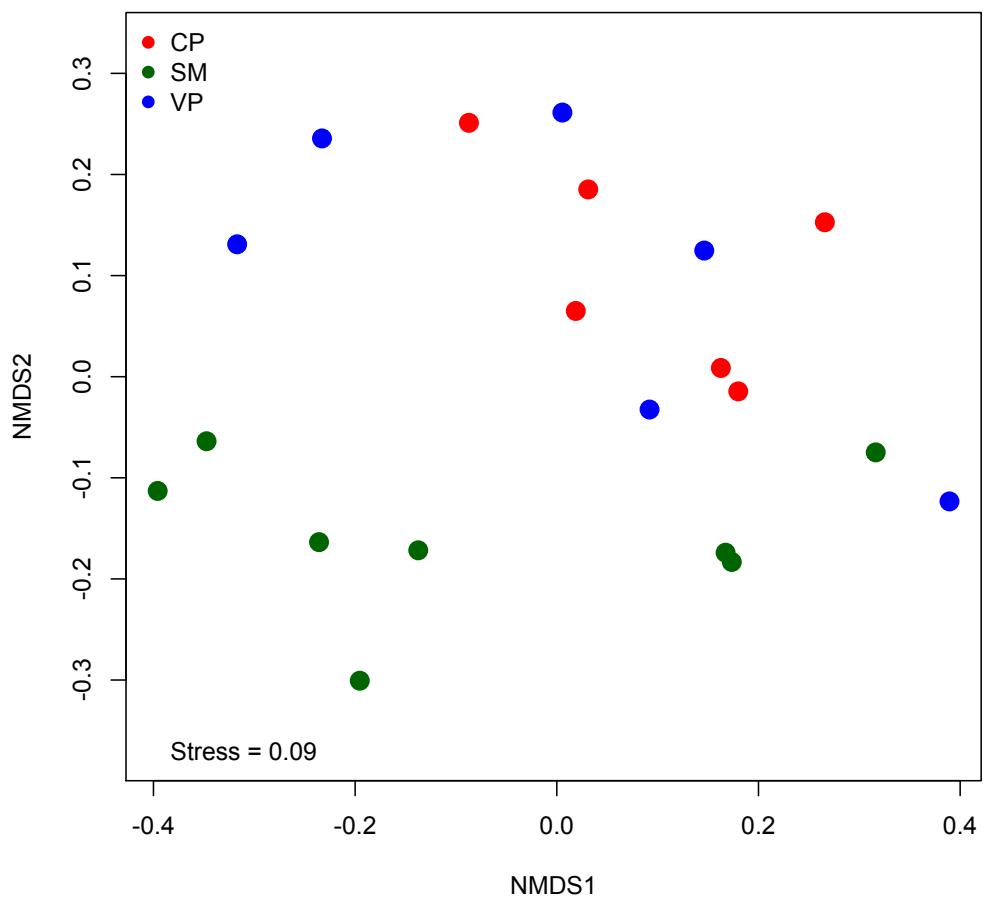

Supplementary Figure S5.

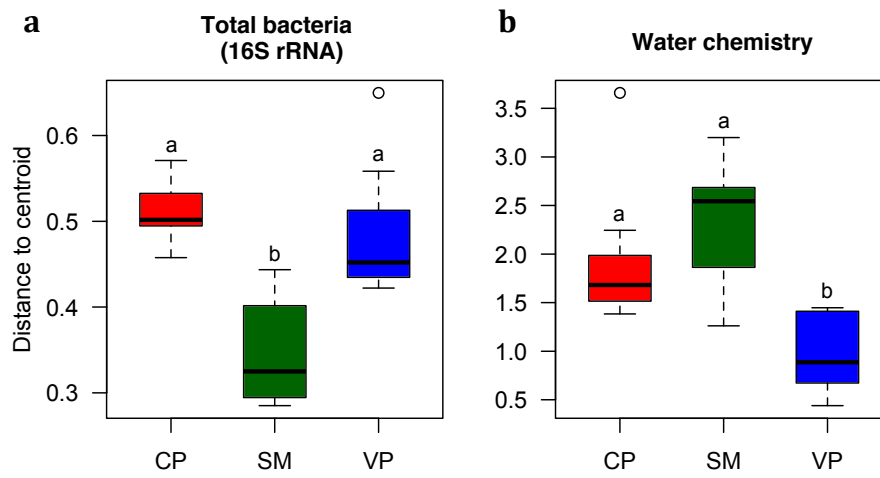

Supplementary Figure S6.

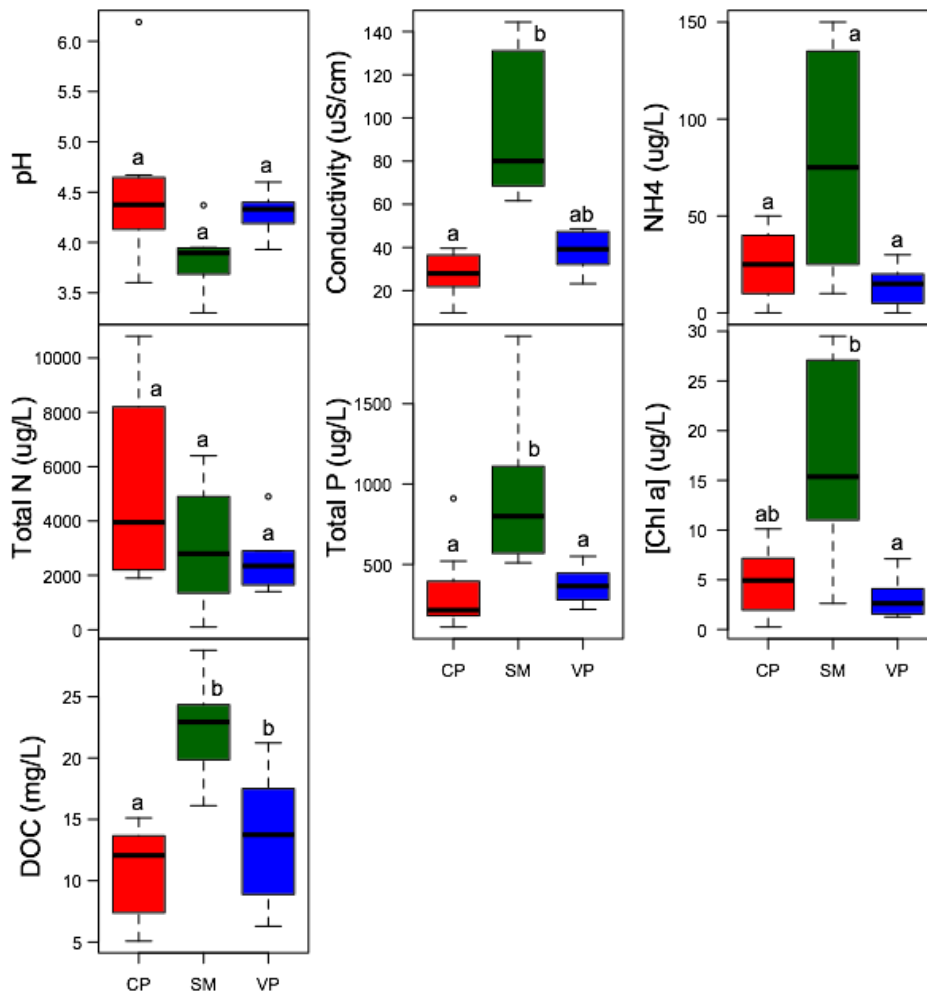

Supplementary Figure S7.

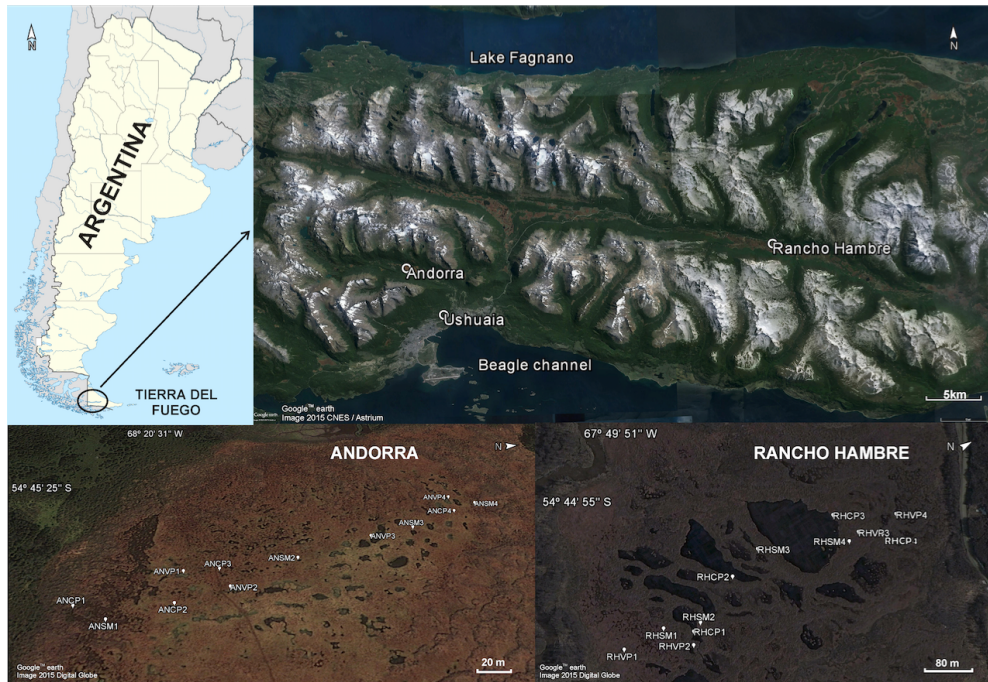

Supplement: srep25712-s1.pdf [file srep25712-s1.pdf]
